# Supplementary material for: Elevated Mood States in Patients With Parkinson’s Disease Treated With Deep Brain Stimulation: Diagnosis and Management Strategies
Source: Atypon-hosted journal article supplement (doi:10.1176/appi.neuropsych.20080205), 2021-07-02
Supplement: appi.neuropsych.20080205.ds001.pdf [file appi.neuropsych.20080205.ds001.pdf]

**Supplemental Table S1. Patient preoperative and postoperative medication regimens.**

| Case | Preoperative                                                                                                                                                                                                                                          |           | Postoperative <sup>a</sup>                                                                                                                                                                                                                                                                                                                                                                                                                                            |                                                    |
|------|-------------------------------------------------------------------------------------------------------------------------------------------------------------------------------------------------------------------------------------------------------|-----------|-----------------------------------------------------------------------------------------------------------------------------------------------------------------------------------------------------------------------------------------------------------------------------------------------------------------------------------------------------------------------------------------------------------------------------------------------------------------------|----------------------------------------------------|
|      | Medications                                                                                                                                                                                                                                           | LEDD (mg) | Medications                                                                                                                                                                                                                                                                                                                                                                                                                                                           | LEDD (mg)                                          |
| 1    | C/L/E 37.5-150-200 mg four times daily<br>Ropinirole 3 mg twice daily<br>Benztropine 2 mg at bedtime                                                                                                                                                  | 918       | C/L 25-100 mg daily                                                                                                                                                                                                                                                                                                                                                                                                                                                   | 100                                                |
| 2    | C/L 25-100 mg ten times daily<br>C/L CR 50-200 mg four times daily<br>Entacapone 200 mg four times daily<br>Rotigotine patch 8 mg/24 hours<br>C/L 50-200 mg rapid dissolve four times daily as needed<br>Apomorphine 2 mg injections weekly as needed | 1972-2392 | C/L 25-100 mg four times daily<br>C/L CR 50-200 mg four times daily<br>Entacapone 200 mg 0.5 tablets eight times daily<br>Rotigotine patch 4 mg/24 hours<br>C/L 50-200 mg rapid dissolve four times daily as needed<br>Apomorphine 2 mg injections weekly as needed<br><hr/> C/L 25-100 mg 9-12 times daily<br>C/L CR 50-200 twice daily<br>Entacapone 0.5 tablets eight times daily<br>Rotigotine patch 8 mg/24 hours<br>Apomorphine 2 mg injections 2-3 times daily | Prescribed<br>1252-1662<br><br>Actual<br>1479-1848 |
| 3    | Rasagiline 1 mg daily<br>Ropinirole 0.5 mg daily<br>Amantadine 100 mg three times daily                                                                                                                                                               | 410       | Rasagiline 1 mg daily<br>Ropinirole 0.5 mg daily<br>Amantadine 100 mg twice daily                                                                                                                                                                                                                                                                                                                                                                                     | 410                                                |
| 4    | C/L ER 95 mg 4 capsules three times daily + 3 capsules at bedtime<br>Rasagiline 1 mg daily                                                                                                                                                            | 955       | C/L ER 95 mg 2 capsules three times daily<br>Rasagiline 1 mg daily                                                                                                                                                                                                                                                                                                                                                                                                    | 328                                                |
| 5    | C/L 25-100 mg 0.5 tablets six times daily<br>C/L CR 25-100 mg six times daily<br>Rasagiline 1 mg daily                                                                                                                                                | 850       | C/L 25-100 mg 0.25 tablets six times daily<br>C/L CR 25-100 mg six times daily<br>Rasagiline 1 mg daily                                                                                                                                                                                                                                                                                                                                                               | 700                                                |

<sup>a</sup>When first elevated mood episode occurred

C/L = carbidopa/levodopa; C/L CR = carbidopa/levodopa sustained release; C/L ER = carbidopa/levodopa extended release capsules; C/L/E = carbidopa/levodopa/entacapone. Dosing: one tablet unless otherwise specified.

LEDD = Ldopa equivalent daily dose. LEDD = (carbidopa/levodopa immediate release dose x 1) + (carbidopa/levodopa controlled-release dose x 0.75) + (carbidopa-levodopa extended release capsules dose x 0.6) + (pramipexole dose x 100) + (ropinirole dose x 20) + (amantadine dose x 1) + (apomorphine dose x 10) + (rasagiline dose x 100) + (rotigotine dose x 30) + (carbidopa-levodopa-entacapone dose x 1.33) {Source: Turner, J: Parkinson's Measurement. <https://www.parkinsonsmeasurement.org/toolBox/levodopaEquivalentDose.htm>}.
